# Supplementary material for: Selective hydrogenation of cinnamaldehyde over magnetic flower-like carbonaceous Pd catalysts
Source: Royal Society of Chemistry journal article supplement (doi:10.1039/d0nj03578e), 2020-01-01
Supplement: d0nj03578e1.pdf [file d0nj03578e1.pdf]

## Supporting information

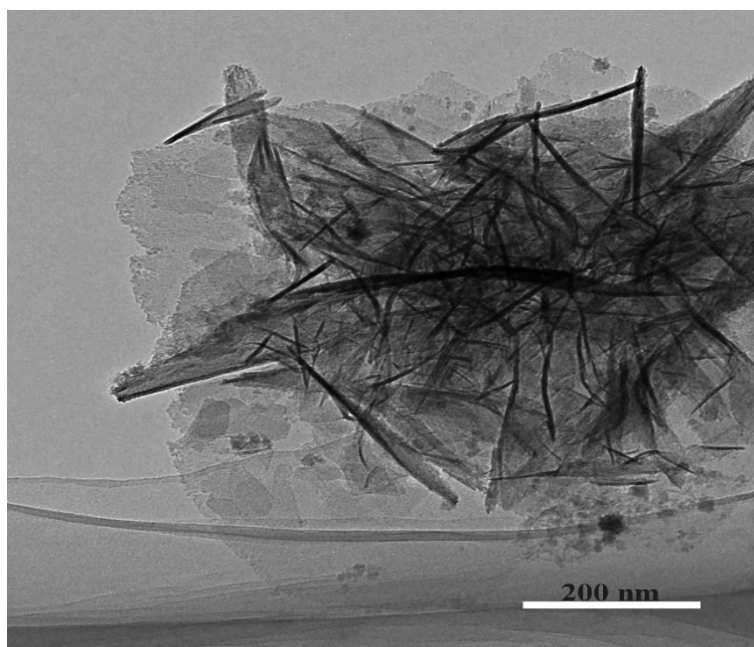

Figure S1. The TEM image of Pd-FONG-3

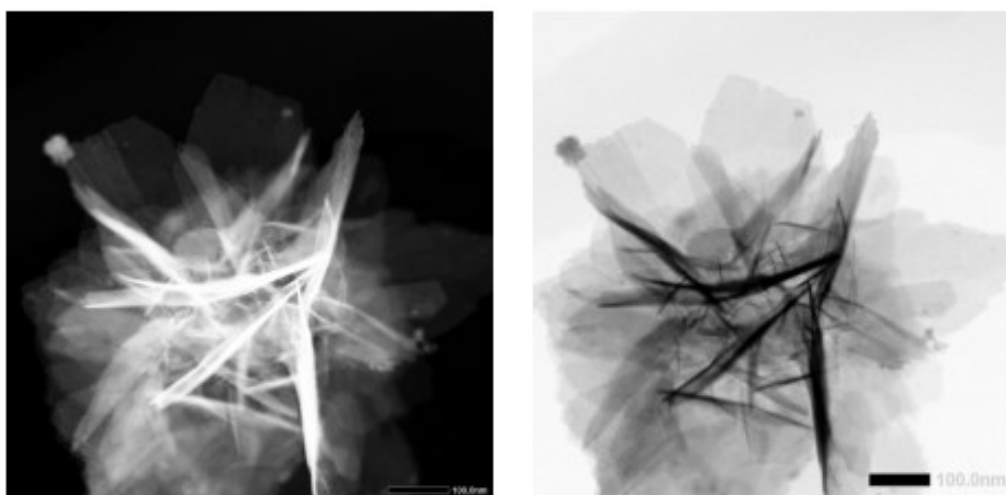

Figure S2. The STEM images of Pd-FONG-3

Table S1 N species in Fe<sub>3</sub>O<sub>4</sub>-NG, Pd-FONG-3 and Pd-NG-3 by XPS analysis

| Catalyst                           | Nitrogen functional groups (BE, eV) |             |                |                 |
|------------------------------------|-------------------------------------|-------------|----------------|-----------------|
|                                    | pyridinic-N (%)                     | amine-N (%) | pyrrolic-N (%) | graphitic-N (%) |
| Fe <sub>3</sub> O <sub>4</sub> -NG | 33                                  | 27          | 19             | 21              |
| Pd-FONG-3                          | 39                                  | 29          | 17             | 15              |
| Pd-NG-3                            | 36                                  | 30          | 25             | 9               |
